# Supplementary material for: A conserved histidine modulates HSPB5 structure to trigger chaperone activity in response to stress-related acidosis
Source: eLife journal article supplement (doi:10.7554/elife.07304), 2015-05-11
Supplement: supp [file elife-07304-supp-v1.zip]

HSPB1 1 MTERRVPFSLLRGPSW-----DPRFDWYPHSRLF---DQA-----FGLPRLPEEWSQW 45  
HSPB2 1 MSGRSVPHAHP-----ATAEYEFANPSRLG---EQR-----FGEGLLPEEILT- 40  
HSPB3 1 MAKIILRHLI-----EIPVRYQ---EEF-----EARGLEDCLRL--- 30  
HSPB4 1 -----MDVTIQHPWFKRTLGP---F-YPSRLF---DQF-----FGEGLFEYDLLPF 39  
HSPB5 1 -----MDIAIHHPWIRRPFFP---FHSPSRLF---DQF-----FGEHLLESDFLPT 40  
HSPB6 1 -----MEIPVPVQPSWLRRASAPLPLGLSAPGRFL---DQR-----FGEGLLEAELAAL 45  
HSPB7 1 MSHRT-----SSTF---RAERSFHSSSSSSSSSTSSSASRALPAQDPPMEKALS-- 46  
HSPB8 1 MADGQMPFSCHYP-SRL--RRDPFRDSPLSSRL---DDG-----FGMDPPFDDLTAS 47  
HSPB9 1 -----MQ---RVGNTFSNESR-----VASR 17  
HSPB11 1 MRKIDLCLSS-----EGSEVILATSSDEKH-----PPENIIDGNPETF 38

HSPB1 46 LG-----GSSWPGYVRPLPPAAIESPAVAAPAYSRALSRQLSSGVSEIRHTADRWRVS 98  
HSPB2 41 -P-----TLYHGYYVRPRAAP-----AGEGSRAGASELRLSEGKFQAF 77  
HSPB3 31 -----DHALYALPGPT--IVDLR---KTRAAQSPPVDSAAETPPREGKSHFQIL 74  
HSPB4 40 LS-----STISPYR-RQ-----SLF---RTVLDSEI SEVRSDDRDKFVIF 74  
HSPB5 41 ST-----SLSPFYR-RP-----PSFLR-APSWFDTGLSEMRLEKDRFSVN 78  
HSPB6 46 CP-----TTLAPYYLRA-----PSV-----ALPVAQVPTDPGHFSVL 77  
HSPB7 47 -----MFSDDFGSFM RP HSEP-----LAFPARPGGAGNIKT LG DAYEFA 85  
HSPB8 48 WPDWALPRLSSAWPGTLRSGMVPR-----GPTA-TARFGVPAEGRTPPPPFPGE PWKVC 99  
HSPB9 18 CPS-----VGLAERNRVAT-----MPV---RLLRDS PAAQEDNDHARDGFQMK 57  
HSPB11 39 WT-----TTG-----MFPQEF IIC 52

.. . : : : :

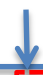

HSPB1 99 LDVNH**F**APDELTV-----KTKDGVVEITGK**H**EE-----**RQDEHG**- 132  
HSPB2 78 LDVSH**F**TFPDEVTV-----RTVDNLLLEVSAR**H**PQ-----**RLDRHG**- 111  
HSPB3 75 LDVVQFLPEDIII-----QTFEGWLLIKAQ**H**GT-----**RMDEHG**- 108  
HSPB4 75 LDVK**H**FSPEDLTV-----KVQDDFVEI**H**GK**H**NE-----**RQDDHG**- 108  
HSPB5 79 LDVK**H**FSPPEELKV-----KVLGDVIEV**H**GK**H**EE-----**RQDEHG**- 112  
HSPB6 78 LDVK**H**FSPPEEIAV-----KVVGEHVEV**H**AR**H**EE-----**RPDEHG**- 111  
HSPB7 86 VDVRDFSPEDIIV-----TTSNNHIEVRAEK-----LAADG- 116  
HSPB8 100 VNVHSFKPEELMV-----KTKDGYVEVSGK**H**EE-----**KQQEGG**- 133  
HSPB9 58 LDAHGFAPEELVV-----QVDGQWLMVGTG**Q**Q**Q**L-----DVRDPER 92  
HSPB11 53 FHK-**H**VRIERLVIQSYFVQTLKIEKSTSKEPVDFEQWIEKDLV**H**TEGQLQNEEIVAHDG**S** 111

: .. : .\*

HSPB1 133 --YIS**R**C**F**T**R**KYTLPPGVDPTQVSSLSPEGLTVEAPMPKLAT--QSN--EITIPVTFE 186  
HSPB2 112 --FVS**R**E**F**C**R**TYVLPADVDPWRVRAALSHDGILNLEAPRGGRHLDTEVN--EVYISLLPA 167  
HSPB3 109 --FIS**R**S**F**T**R**QYKLPDGVEIKDLSAVLCHDGILVVEVKDPVGTK----- 150  
HSPB4 109 --YIS**R**E**F****H**R**R**YRLPSNVDQSALSCSLADGMLTFCGPKIQTGLDATHA--ERAIPVSRE 164  
HSPB5 113 --FIS**R**E**F****H**R**R**KYRIPADVPLTITSSLSDDGVLTVNGPRKQV----SGP--ERTIPITRE 164  
HSPB6 112 --FVA**R**E**F****H**R**R**YRLPPGVDPAAVTSALSPEGVLSIQAAPASAQAPPPAA--AK----- 160  
HSPB7 117 --TVMNTFAHKCQLPEDVDPTSVT SALREDGSLTIRARRHPHTEHVQQ-TFRTEIKI--- 170  
HSPB8 134 --IVS**K**N**F**T**K**KIQLP AEVDPVTVFASLSPEGLLIEAPQVPPYSTFGESSFNNELPQDSQ 191  
HSPB9 93 VSY**R**MS**Q**V**H**R**K**M LPSNLSPTAMTCCLTPSGQLWVRGQCVALALPEAQ TGP----- 143  
HSPB11 112 ATYL-----RFIIVSADFHFASVSVSAEGTVVSNLSS----- 144

|       |     |                        |     |
|-------|-----|------------------------|-----|
| HSPB1 | 187 | SRAQLGGPEAAKSDETAAK--- | 205 |
| HSPB2 | 168 | -----PPDPEEEEEAAIVEP   | 182 |
| HSPB3 | 151 | -----                  | 150 |
| HSPB4 | 165 | EKPTSAPSS-----         | 173 |
| HSPB5 | 165 | EKPAVTAAPK-----        | 175 |
| HSPB6 | 161 | -----                  | 160 |
| HSPB7 | 171 | -----                  | 170 |
| HSPB8 | 192 | E-----VTCT----         | 196 |
| HSPB9 | 144 | -SPRLGSLGSKASNLTR----- | 159 |
| IFT25 | 145 | -----                  | 144 |
