# Supplementary figures and images for: A conserved histidine modulates HSPB5 structure to trigger chaperone activity in response to stress-related acidosis
Source: eLife journal article supplement (doi:10.7554/elife.07304), 2015-05-11

A

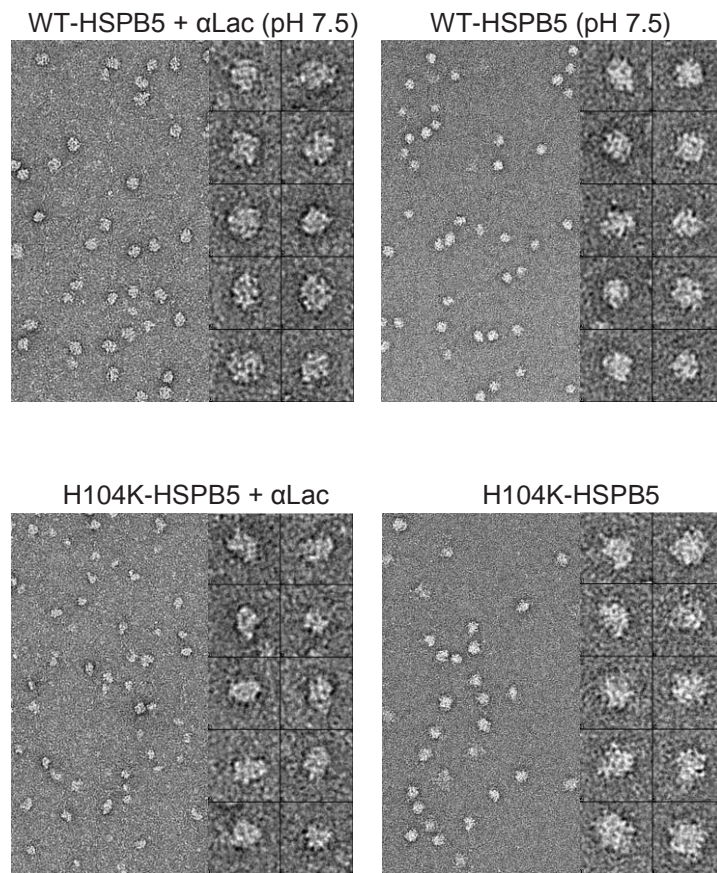

B

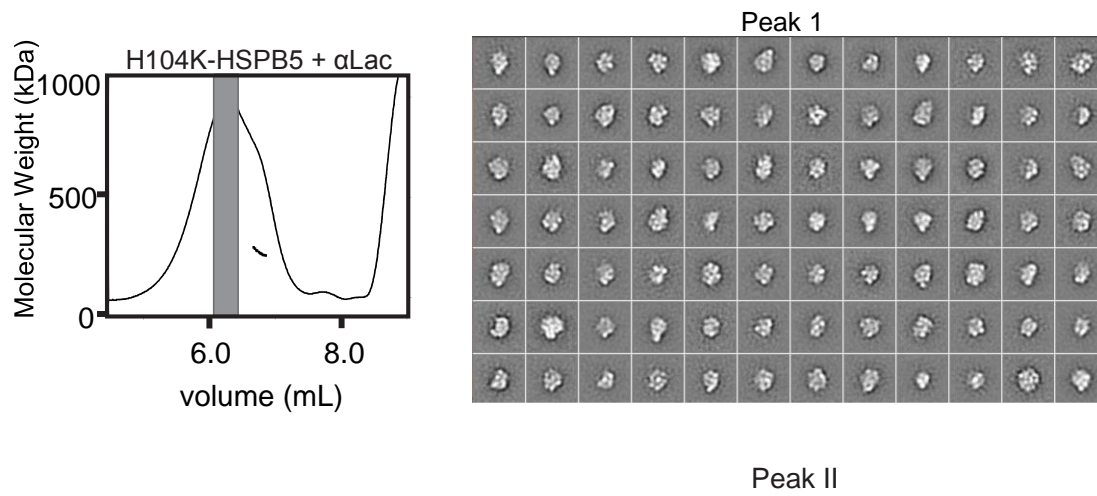

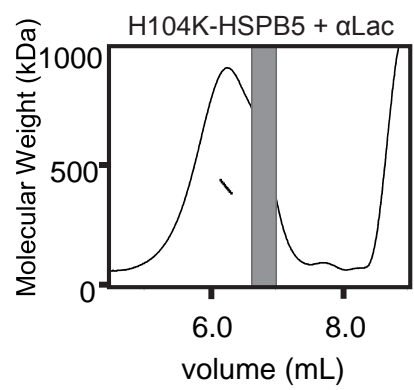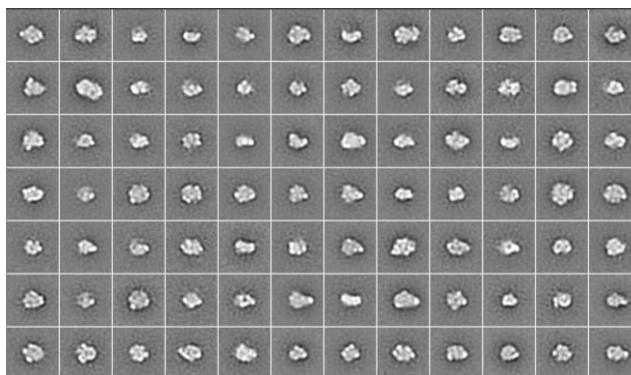

Supplement: supp [file elife-07304-supp-v1.zip]

A

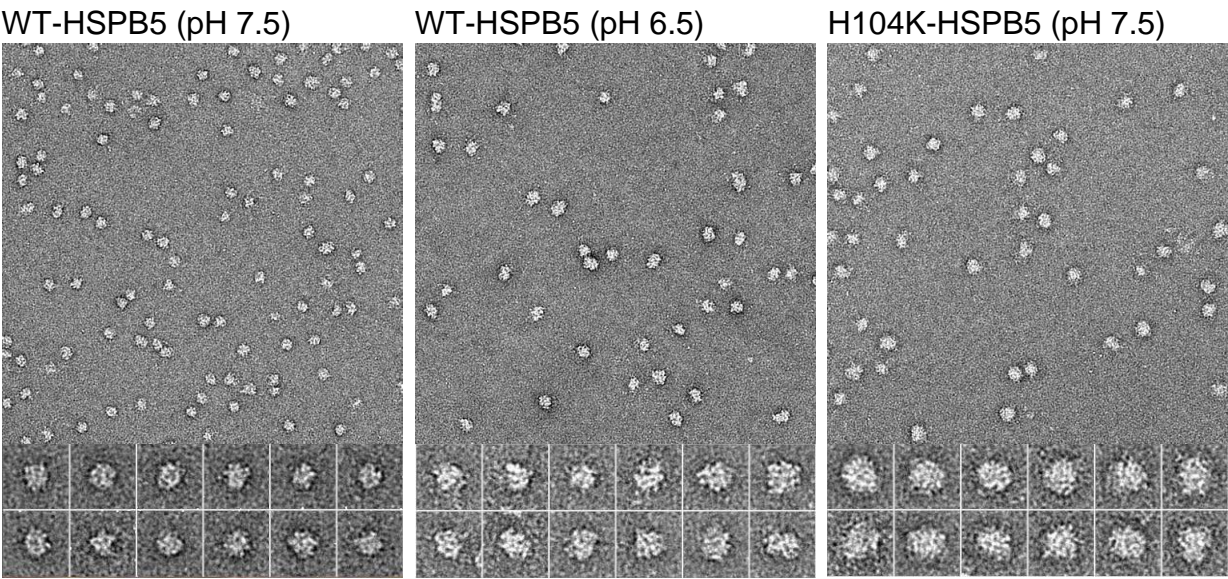

B

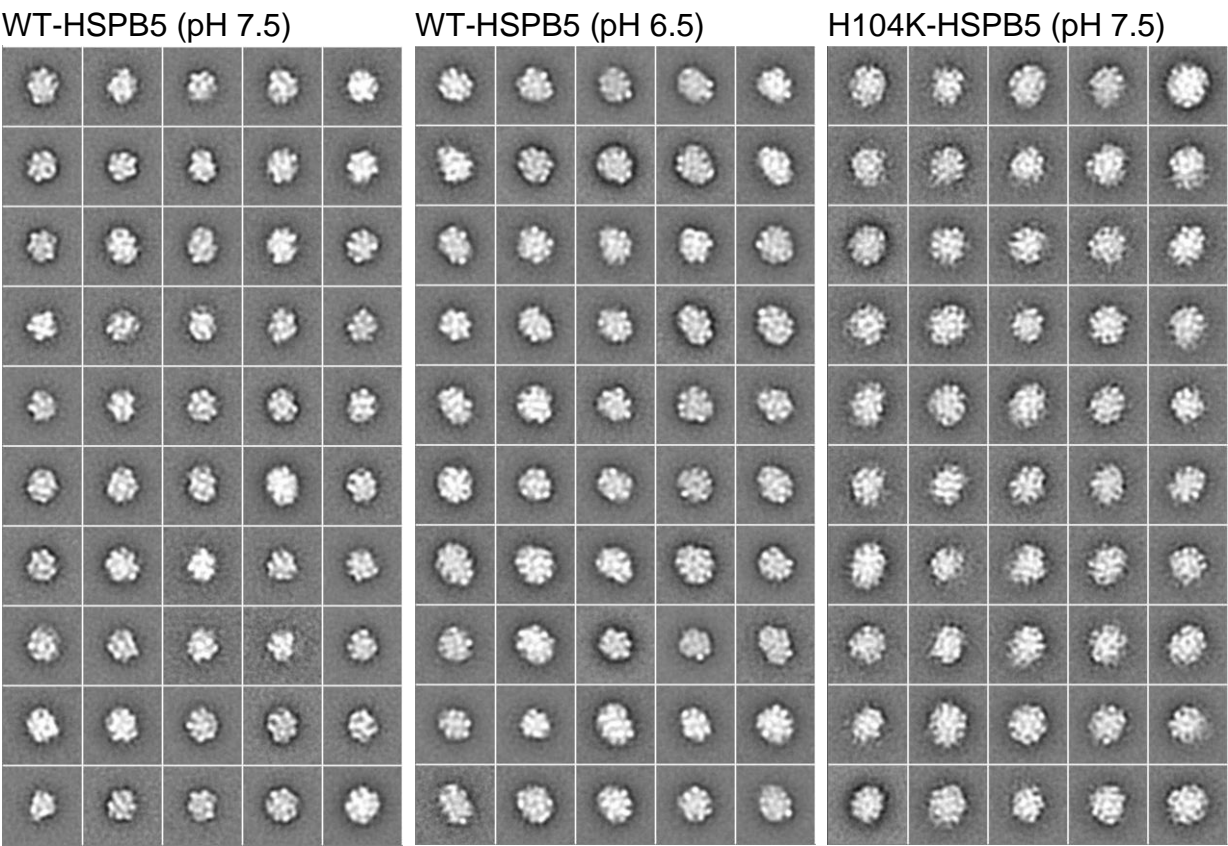

C

Class Averages

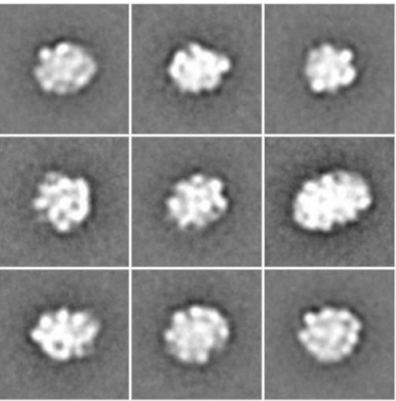

Rotational Averages

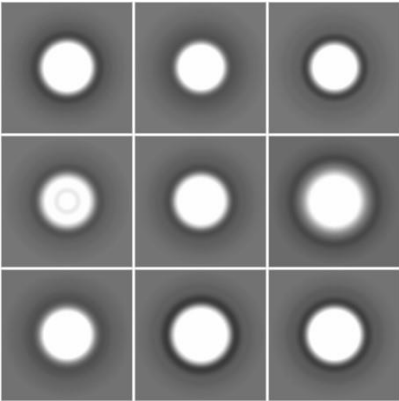

Approximate Diameter

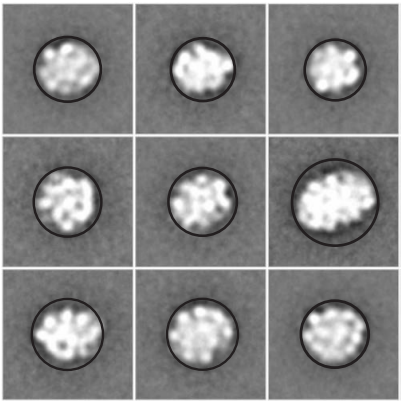

Supplement: supp [file elife-07304-supp-v1.zip]

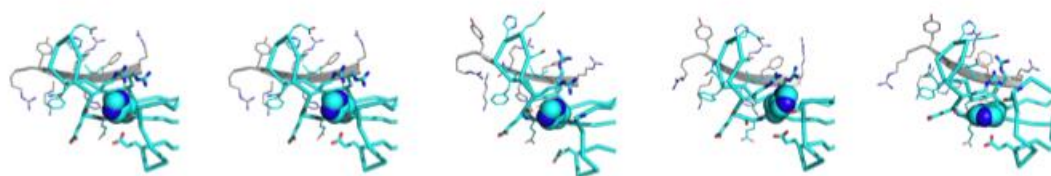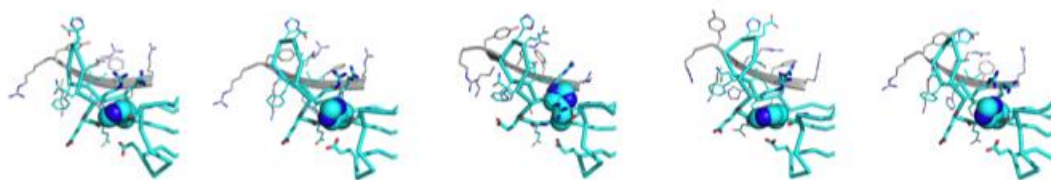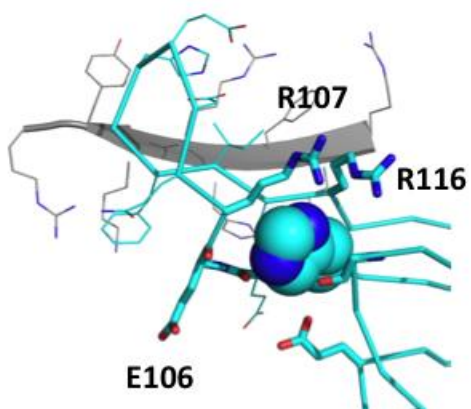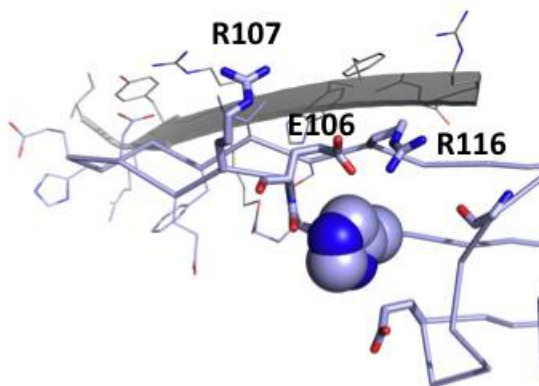

Supplement: supp [file elife-07304-supp-v1.zip]
